# Supplementary material for: Burden of allergic respiratory disease: a systematic review
Source: PubMed Central journal article supplement (PMC5041537; doi:10.1186/s12948-016-0049-9), 2016-09-28

## Supplementary information

### Database search strategies

Table S1 Ovid search strategy for National Institute For Health Research Health Technology Assessment Programme databases and outcomes

| Topic             | #  | Term                                                                                                              | Number of results     |                   |                      |                       |                              |
|-------------------|----|-------------------------------------------------------------------------------------------------------------------|-----------------------|-------------------|----------------------|-----------------------|------------------------------|
|                   |    |                                                                                                                   | Medline<br>(30/01/14) | EBM<br>(30/01/14) | Embase<br>(30/01/14) | EconLit<br>(30/01/14) | ALL<br>sources<br>(30/01/14) |
| Population        | 1  | Allerg*                                                                                                           | 160125                | 20449             | 171126               | 152                   | 391146                       |
|                   | 2  | Rhin*                                                                                                             | 65944                 | 13223             | 217391               | 27                    | 154391                       |
|                   | 3  | Asthma.hw,mp                                                                                                      | 132121                | 7406              | 80643                | 178                   | 324224                       |
|                   | 4  | 1 and 2                                                                                                           | 25550                 | 5184              | 33406                | 5                     | 64224                        |
|                   | 5  | 1 and 3                                                                                                           | 37049                 | 3787              | 64950                | 4                     | 105934                       |
|                   | 6  | 4 or 5                                                                                                            | 51605                 | 7814              | 79623                | 9                     | 139213                       |
| Outcome           | 7  | quality of life                                                                                                   | 185199                | 32860             | 297219               | 2083                  | 518252                       |
|                   | 8  | Fatigue                                                                                                           | 65124                 | 8331              | 137058               | 150                   | 211021                       |
|                   | 9  | Impair*                                                                                                           | 449149                | 22880             | 595645               | 1070                  | 1070743                      |
|                   | 10 | Dyspn*                                                                                                            | 38455                 | 3247              | 92773                | 2                     | 134715                       |
|                   | 11 | Dysphor*                                                                                                          | 3673                  | 703               | 7062                 | 2                     | 11448                        |
|                   | 12 | Activ*                                                                                                            | 3607584               | 102537            | 3964291              | 73587                 | 7757535                      |
|                   | 13 | Emotion*                                                                                                          | 126503                | 7715              | 163588               | 1962                  | 300197                       |
|                   | 14 | Cogniti*                                                                                                          | 249739                | 24698             | 351688               | 4511                  | 631702                       |
|                   | 15 | Eye                                                                                                               | 269749                | 12225             | 268689               | 559                   | 551756                       |
|                   | 16 | Nasal*                                                                                                            | 93129                 | 8665              | 87747                | 2                     | 189739                       |
|                   | 17 | Nose                                                                                                              | 50216                 | 2611              | 89187                | 17                    | 142237                       |
|                   | 18 | practical                                                                                                         | 164772                | 4585              | 164384               | 10180                 | 344405                       |
|                   | 19 | Functional                                                                                                        | 2538295               | 88797             | 3007084              | 59843                 | 5702092                      |
|                   | 20 | Impact*                                                                                                           | 529644                | 39581             | 711237               | 102616                | 1386072                      |
|                   | 21 | Sleep                                                                                                             | 122791                | 12884             | 152196               | 107                   | 288389                       |
|                   | 22 | Work                                                                                                              | 580606                | 20092             | 672675               | 51176                 | 1326717                      |
|                   | 23 | School                                                                                                            | 156849                | 10900             | 386544               | 20428                 | 575717                       |
|                   | 24 | Cost                                                                                                              | 312480                | 43218             | 500688               | 71907                 | 929426                       |
|                   | 25 | Prevalence                                                                                                        | 424497                | 14927             | 567133               | 2529                  | 1010896                      |
|                   | 26 | Incidence                                                                                                         | 571991                | 42823             | 660675               | 13599                 | 1290802                      |
|                   | 27 | 7 or 8 or 9 or 10 or 11 or 12 or 13 or 14 or 15 or 16 or 17 or 18 or 19 or 20 or 21 or 22 or 23 or 24 or 25 or 26 | 7851421               | 314447            | 8989198              | 336384                | 17514992                     |
| HDM<br>OR<br>GRAS | 28 | dust mite*                                                                                                        | 5355                  | 667               | 7105                 | 0                     | 13147                        |
|                   | 29 | house adj2 mite*                                                                                                  | 4519                  | 585               | 5802                 | 0                     | 10922                        |

|        |    |                                                   |         |      |         |     |         |
|--------|----|---------------------------------------------------|---------|------|---------|-----|---------|
|        | 30 | 28 or 29                                          | 5459    | 676  | 7173    | 0   | 13328   |
|        | 31 | grass                                             | 14759   | 951  | 18258   | 324 | 34344   |
|        | 32 | pollen                                            | 22554   | 1890 | 24366   | 31  | 48910   |
|        | 33 | 31 and 32                                         | 3012    | 782  | 5018    | 1   | 8816    |
|        | 34 | 30 or 33                                          | 8079    | 1422 | 11425   | 1   | 20949   |
| Papers | 35 | 6 and 27 and 34                                   | 2737    | 702  | 4678    | 0   | 8124    |
|        | 36 | limit 35 to (humans and yr='2000-Current')        | 1492    | 403  | 2989    | 0   | 4892    |
|        | 37 | (editorial or letter or news or case reports).pt. | 2795475 | 7217 | 1150854 | 0   | 3956545 |
|        | 38 | 36 not 37                                         | 1461    | 403  | 2943    | 0   | 4815    |
|        | 39 | remove duplicates from 38                         | 1455    | 395  | 2839    | 0   | 3095    |
|        | 40 | limit 39 to english language                      | 1326    | 395  | 2581    | 0   | 2810    |
|        | 41 | Limit 41 to journal articles                      | 1326    | 337  | 2581    | 0   | 2766    |

*Additional search strategies and outcomes*

National Guidelines Clearing House (<http://guideline.gov/>); Keyword: respiratory hypersensitivity; Clinical Specialty: Allergy and Immunology; Publication Years: 2000, 2002, 2003, 2004, 2005, 2006, 2007, 2008, 2009, 2010, 2011, 2012, 2013; 19 studies identified

NHS Evidence (<http://www.evidence.nhs.uk/>), no studies identified

EuroScan (<http://euroscan.org.uk/>); Technology Search: rhinitis; Speciality: Respiratory disease, immunotherapy; 1 study identified

ClinicalTrials.gov (<http://www.clinicaltrials.gov>) (allergic AND (rhinitis OR asthma)) AND (mites or grass); 8 studies identified.

HEED (Wiley InterScience) AX=allerg\* AND AX=rhin\* OR AX=allerg\* AND AX=asthma AND TY= METHODOLOGICAL OR STUDY OR STUDIES OR REVIEW; 169 studies identified.

**Figure S1** RQLQ domain scores by allergy phenotype. Studies are listed from the top as SAR, Mixed, and PAR. The scale below the lower plot applies to all plots in each column.

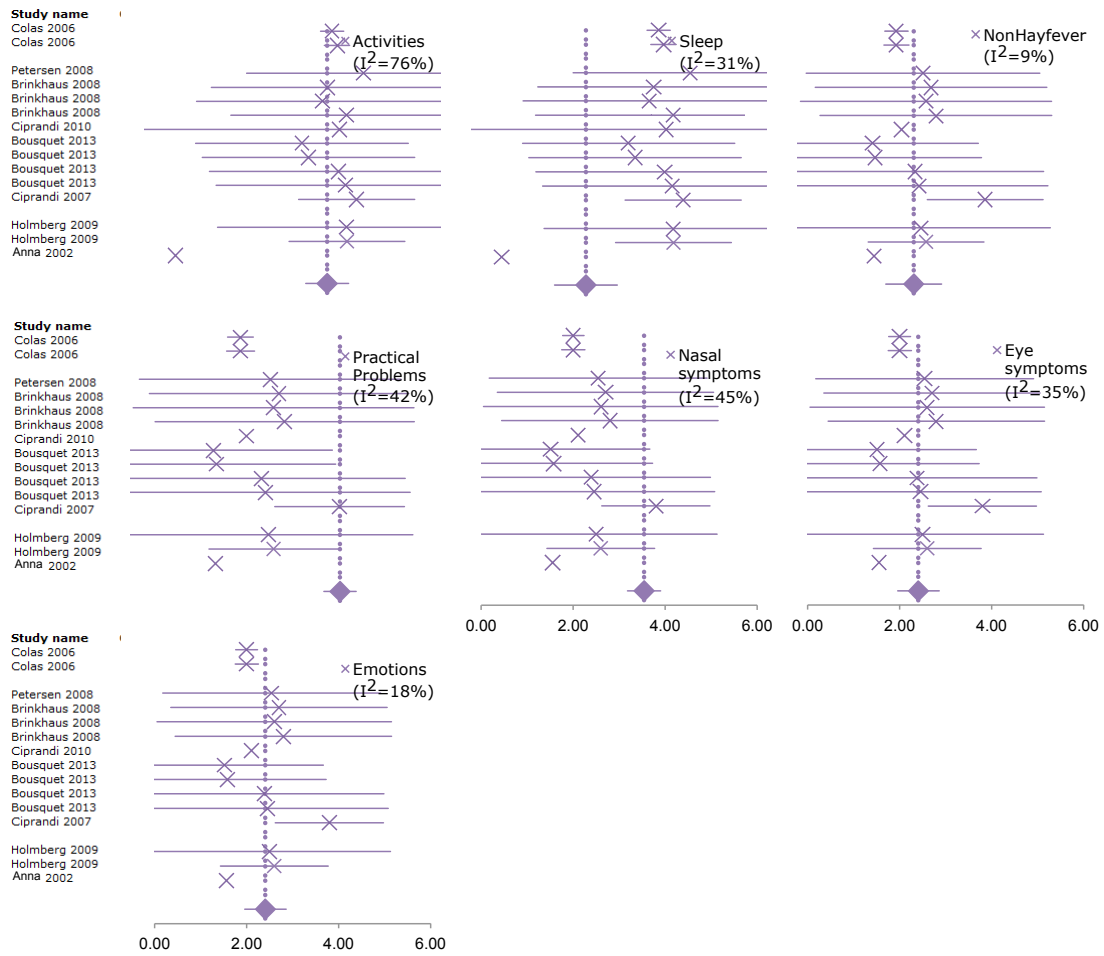

**Figure S2** SF-36 domain scores by allergy phenotype. Studies are listed from the top as SAR, Mixed, and PAR. The scale below the lower plot applies to all plots in each column.

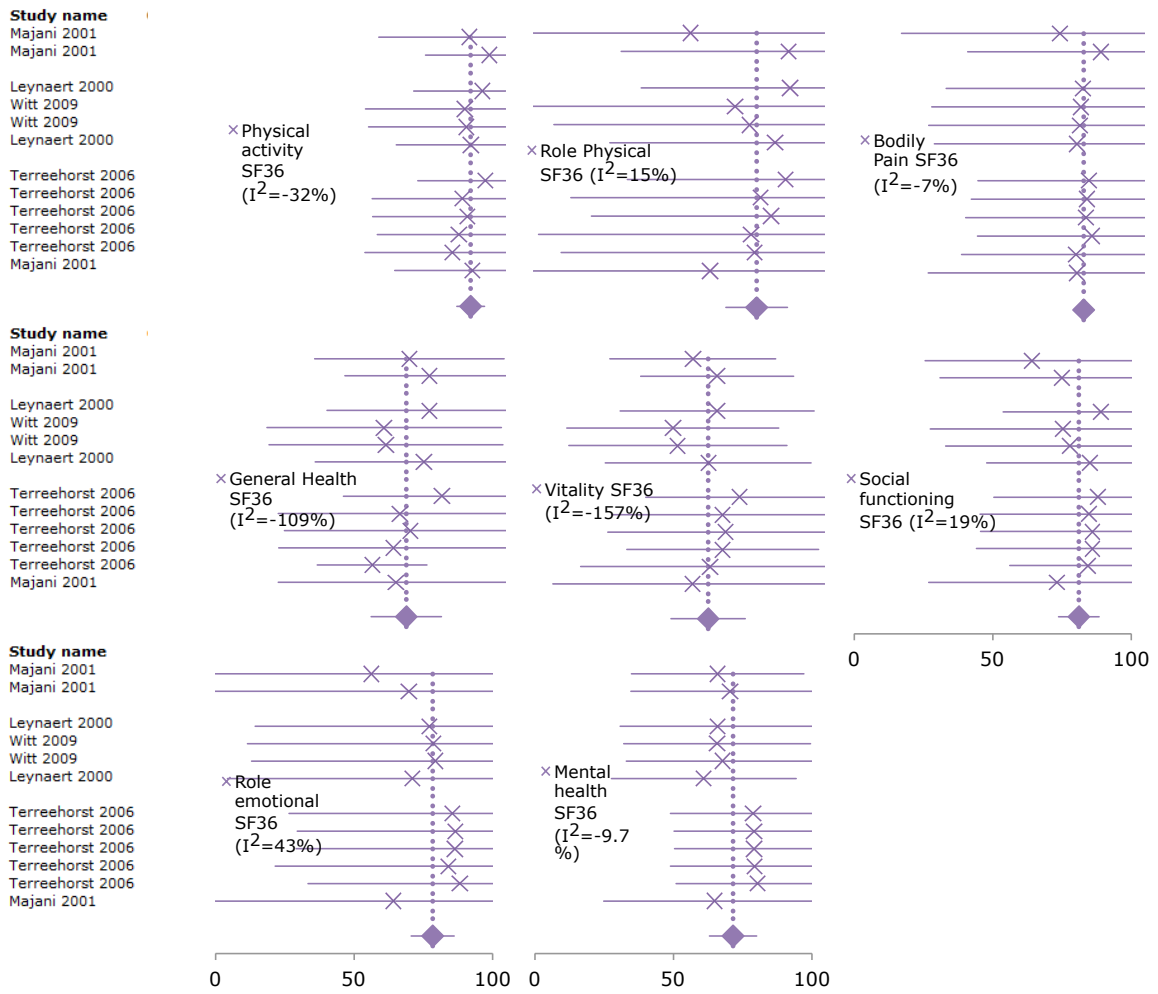

Supplement: 12948_2016_49_MOESM1_ESM.pdf [file 12948_2016_49_MOESM1_ESM.pdf]
